# Supplementary material for: C ∕ N ratio, stable isotope ( δ 13 C, δ 15 N), and n -alkane patterns of brown mosses along hydrological gradients of low-centred polygons of the Siberian Arctic
Source: Copernicus journal article supplement (doi:10.5194/bg-14-1617-2017), 2017-03-28
Supplement: Supplementary file 1 [file bg-14-1617-2017-supplement.pdf]

Supplement of Biogeosciences, 14, 1617–1630, 2017  
<http://www.biogeosciences.net/14/1617/2017/>  
doi:10.5194/bg-14-1617-2017-supplement  
© Author(s) 2017. CC Attribution 3.0 License.

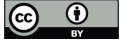

Biogeosciences  Open Access

*Supplement of*

**C / N ratio, stable isotope ( $\delta^{13}\text{C}$ ,  $\delta^{15}\text{N}$ ), and *n*-alkane patterns of brown mosses along hydrological gradients of low-centred polygons of the Siberian Arctic**

**Romy Zibulski et al.**

*Correspondence to:* Romy Zibulski (romy.zibulski@awi.de)

The copyright of individual parts of the supplement might differ from the CC-BY 3.0 licence.

**Table S1:** Brief description of studied polygons. (For further information see Zibulski et al., 2016)

| polygon cross section,<br>(length of transect = polygon size)                       | <div style="display: flex; flex-direction: column; gap: 5px;"> <span style="color: red;">- - -</span> moss layer <span style="color: green;">—</span> surface height <span style="color: blue;">- - -</span> permafrost table <span style="color: purple;">- - -</span> water level </div> | coordinates              | short description<br>vegetation type; additional<br>information                                              |
|-------------------------------------------------------------------------------------|--------------------------------------------------------------------------------------------------------------------------------------------------------------------------------------------------------------------------------------------------------------------------------------------|--------------------------|--------------------------------------------------------------------------------------------------------------|
| 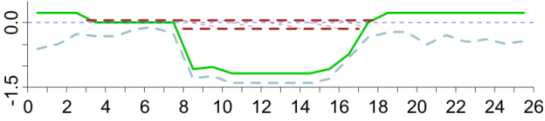   | 06/P                                                                                                                                                                                                                                                                                       | 70.666° N,<br>97.708° E  | open forest; swinging bog<br>(mat of mosses)                                                                 |
|    | 17/P                                                                                                                                                                                                                                                                                       | 72.243° N,<br>102.233° E | forest-tundra intersection;<br>shallow and sparsely<br>vegetated                                             |
|    | P3/I                                                                                                                                                                                                                                                                                       | 72.149° N,<br>102.693° E | forest-tundra intersection;<br>a complex of three<br>individual polygons:<br>P3/I - deep, open water<br>body |
|    | P3/II                                                                                                                                                                                                                                                                                      |                          | P3/II - shallow, open water<br>body                                                                          |
|   | P3/III                                                                                                                                                                                                                                                                                     |                          | P3/III - shallow completely<br>vegetated                                                                     |
|  | 12/P                                                                                                                                                                                                                                                                                       | 72.431° N,<br>102.373° E | tundra; shallow and<br>vegetated                                                                             |
|  | LP1                                                                                                                                                                                                                                                                                        | 72.375° N,<br>126.483° E | tundra; deep polygon<br>without thaw depth below<br>the water body                                           |
|  | LP2                                                                                                                                                                                                                                                                                        | 72.370° N,<br>126.481° E | tundra; shallow and<br>vegetated                                                                             |

**Table S2:**  $C/N_{(m)}$  ratio,  $\delta^{13}C$  and  $\delta^{15}N$  data of individual mosses depending on their position relative to the water-level (cm).

| Species                            | $C/N_{(m)}$ ratio |               | n  | $\delta^{13}C$ [‰] |                   | n  | $\delta^{15}N$ [‰] |                |
|------------------------------------|-------------------|---------------|----|--------------------|-------------------|----|--------------------|----------------|
|                                    | median            | range         |    | median             | range             |    | median             | range          |
| <i>H. splendens</i><br>(Hyl_spl)   | 47.1              | 29.5 to 67.9  | 34 | -29.4              | -32.1 to -25.6    | 31 | -2.7               | -5.0 to +1.2   |
| <i>T. nitens</i><br>(Tom_nit)      | 52.9              | 30.1 to 66.6* | 46 | -29.0              | -30.9 to -24.5    | 30 | -2.8               | -6.4 to +0.4   |
| <i>A. turgidum</i><br>(Aul_tur)    | 52.4              | 29.9 to 64.3  | 41 | -27.8              | -30.4 to 24.3     | 24 | -3.2               | -6.1 to -1.2   |
| <i>A. palustre</i><br>(Aul_pal)    | 49.6              | 22.5 to 66.9  | 40 | -27.1              | -30.1 to -24.2    | 30 | -2.7               | -6.6 to +0.4   |
| <i>H. lapponicus</i><br>(Ham_lap)  | 46.5              | 28.3 to 56.1  | 10 | -24.8              | -26.6 to -23.2    | 9  | -0.1               | -1.2 to +0.4   |
| <i>W. exannulata</i><br>(War_exa)  | 38.4              | 17.3 to 70.4  | 20 | -26.8              | -34.5 to -22.6    | 19 | -1.4               | -4.5 to 0.0    |
| <i>M. triquetra</i><br>(Mee_tri)   | 37.1              | 25.8 to 50.7  | 45 | -26.1              | -37.0 to -22.5*   | 34 | -1.3               | -3.2 to +1.4   |
| <i>D. revolvens</i><br>(Dre_rev)   | 42.6              | 17.5 to 64.1  | 72 | -28.7              | -34.9 to -22.5*   | 67 | -2.3               | -5.2 to +1.6** |
| <i>S. scorpioides</i><br>(Sco_sco) | 38.9              | 15.4 to 62.8  | 69 | -27.2              | -33.0 to -22.8*** | 65 | -1.5               | -4.5 to +1.7** |
| <i>C. giganteum</i><br>(Cal_gig)   | 42.6              | 28.6 to 58.7  | 23 | -29.2              | -34.7 to -22.8    | 17 | -2.9               | -6.1 to +1.2** |

Stars designate significant linear regressions between parameter and the plant position relative to water-level (\*  $p \leq 0.01$ , \*\*  $p \leq 0.05$ , \*\*\*  $p \leq 0.001$ ).
